# Supplementary material for: Factors Affecting Spine–Femur Discordance in The Percentage of Young Adult Mean On Dual-Energy X-Ray Absorptiometry in The Elderly Population: A Retrospective Study
Source: Research Square preprint supplement (doi:10.21203/rs.3.rs-890621/v1), 2021-09-21
Supplement: Supplementary file 1 [file 6b20081a7bf50e73042d9758.xlsx]

## Sheet: Table.2(線形回帰分析)
Table 2. Comparison among the groups of discordance in the percentage of YAM (n = 2161)
			Group A: ≥ 10 (n=1129, 52.2%)		Group B: ≥ -10 to < 10 (n=887, 41.0%)		Group C: < -10 (n=145, 6.7%)		p-value
									for all		A vs. B	A vs. C	B vs. C
	Age (years)		78.0 ± 8.7		74.8 ± 8.7		73.2 ± 8.5		< 0.001	a	< 0.001	< 0.001	0.105792	b
	Male, n (%)		174 (15.4%)		80 (9.0%)		15 (10.3%)		< 0.001	c	< 0.001	0.406012	> 0.999	d
	BMI > 30 kg/cm2, n (%)		20 (1.8%)		11 (1.2%)		16 (0.7%)		0.527837	c
	Current smoking, n (%)		38 (3.4%)		37 (4.2%)		10 (6.9%)		0.11144	c
	Alcohol abuse, n (%)		35 (3.1%)		23 (2.6%)		2 (1.4%)		0.541644	c
	Diabetes mellitus, n (%)		150(13.3%)		79 (8.9%)		13 (9.0%)		0.00581438	c	0.00693725	0.556146	> 0.999	d
	Corticosteroid use, n (%)		156 (13.8%)		99 (11.2%)		15 (10.3%)		0.15446	c
	Rheumatoid arthritis, n (%)		100 (8.9%)		64 (7.2%)		17 (6.9%)		0.375873	c
	Percentage of YAM at LS (%)		87.9 ± 18.3		70.5 ± 13.3		63.1 ± 10.4		< 0.001	a	< 0.001	< 0.001	< 0.001	b
	Percentage of YAM at FN (%)		64.3 ± 14.6		69.6 ± 13.1		79.3 ± 12.0		< 0.001	a	< 0.001	< 0.001	< 0.001	b
Data are presented as mean ± standard deviation or n (%)
Body mass index; BMI, LS, lumbar spine; FN, femoral neck; YAM, young adult mean
p-value : a, ANOVA; b, unpaired t test with Bonferroni correction; c, Fisher's exact test; d, Fisher's exact test with Bonferroni correction
