# Supplementary material for: Factors Affecting Spine–Femur Discordance in The Percentage of Young Adult Mean On Dual-Energy X-Ray Absorptiometry in The Elderly Population: A Retrospective Study
Source: Research Square preprint supplement (doi:10.21203/rs.3.rs-890621/v1), 2021-09-21
Supplement: Supplementary file 3 [file bc9feae47a5b6900b5ea9f79.xlsx]

## Sheet: Table.1(単純集計)
Table 1. Characteristics of the study population (n = 2161)
				All		Age group
				Mean age: 76.4 ± 8.9(years)		50s		60s		70s		80s		90s
	n (%)			2161(100%)		74 (3.4%)		446 (20.6%)		736 (34.1%)		799 (37.0%)		106 (4.9%)
	Sex	Male, n (%)		269 (12.4%)		10		57		93		93		16
		Female, n (%)		1892 (87.6%)		64		389		643		706		90
	Body mass index > 30 kg/cm2, n (%)			32 (1.5%)		4		8		12		7		1
	Current smoking, n (%)			85 (3.9%)		4		33		40		6		2
	Alcohol abuse, n (%)			60 (2.8%)		3		17		28		10		2
	Diabetes mellitus, n (%)			242 (11.2%)		13		48		87		92		2
	Corticosteroid use, n (%)			270 (12.5%)		17		66		73		107		7
	Rheumatoid arthritis, n (%)			174 (8.1%)		6		58		52		55		3
	Mean percentage of YAM at LS (%)			79.1 ± 18.5		82.5 ± 20.8		80.8 ± 18.9		80.4 ± 18.3		77.5 ± 18.0		72.5 ± 17.9
	Mean percentage of YAM at FN (%)			67.5 ± 14.4		75.1 ± 13.5		73.7 ± 14.1		69.2 ± 13.0		63.3 ± 13.8		55.3 ± 13.6
Data are presented as mean ± standard deviation or n (%)
LS, lumbar spine; FN, femoral neck; YAM, young adult mean
